# Supplementary material
Source: PubMed Central journal article supplement (PMC4998052)
Supplement: NIHMS809561-supplement-Supp_Fig_S7.pdf [file NIHMS809561-supplement-Supp_Fig_S7.pdf]

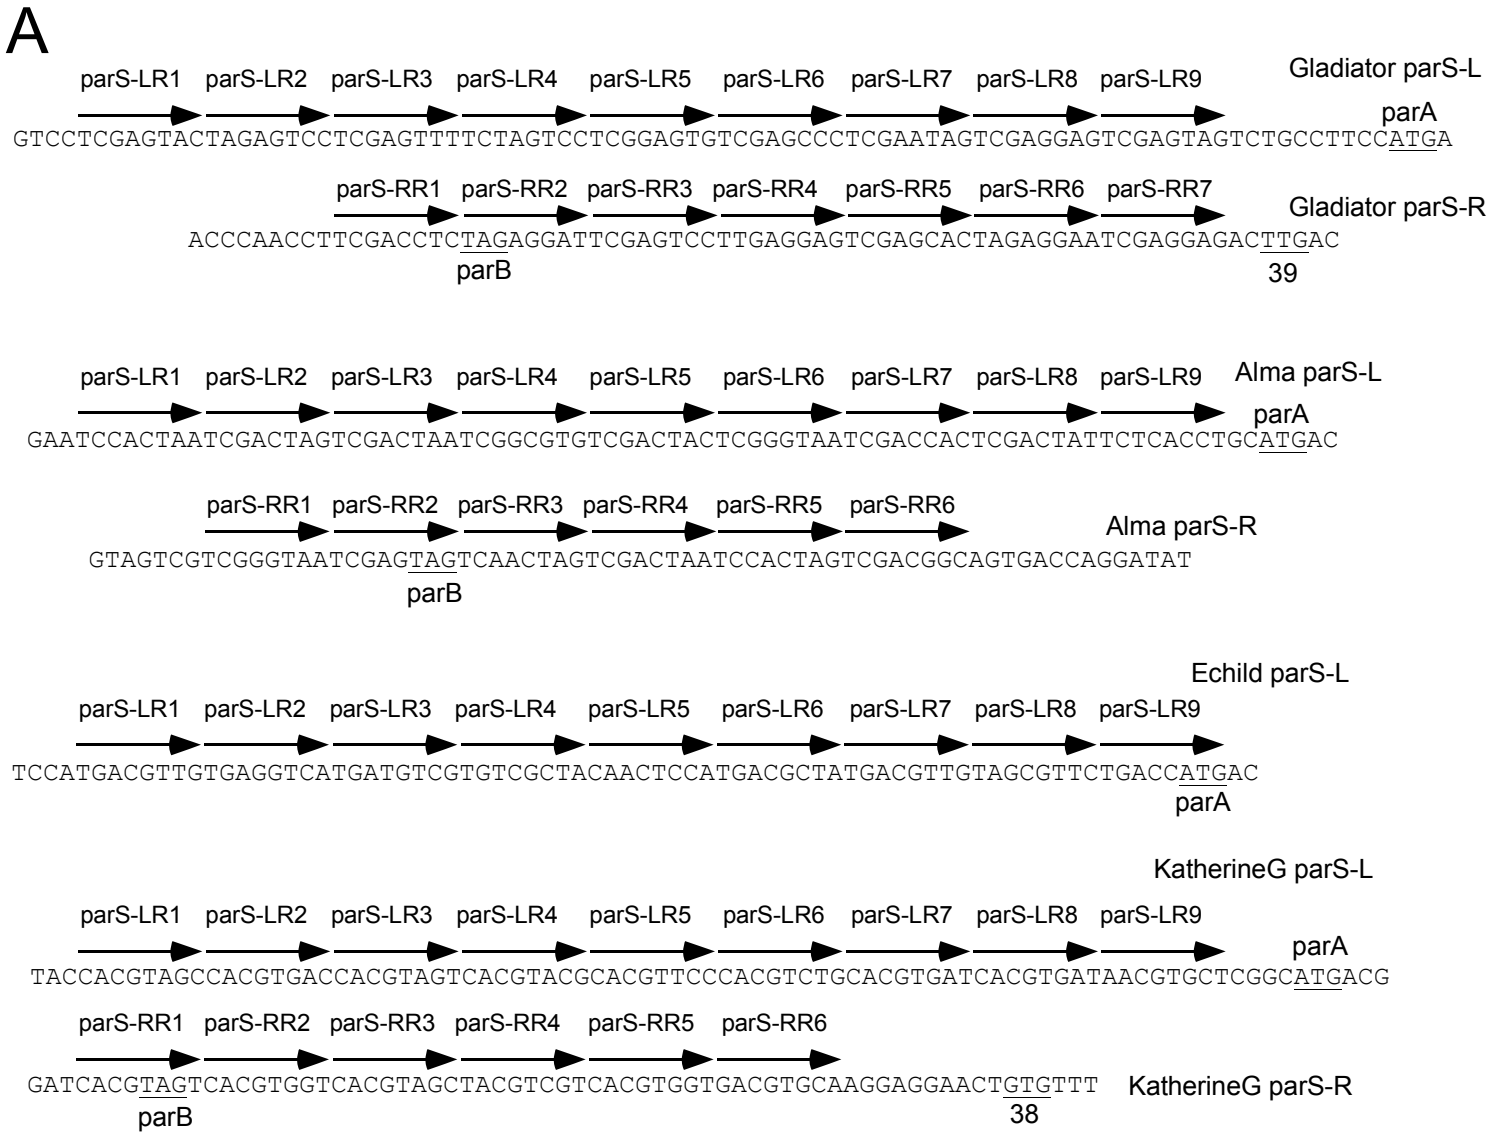

**B**

| Gladiator                          |           | Alma     |           | Echild                              |           | KatherineG |           |
|------------------------------------|-----------|----------|-----------|-------------------------------------|-----------|------------|-----------|
| TCGAGTAC                           | parS-LR1  | TCCACTAA | parS-LR1  | TGACGTTG                            | parS-LR1  | CACGTAGC   | parS-LR1  |
| TAGAGTCC                           | parS-LR2  | TCGACTAG | parS-LR2  | TGAGGTCA                            | parS-LR2  | CACGTGAC   | parS-LR2  |
| TCGAGTTT                           | parS-LR3  | TCGACTAA | parS-LR3  | TGATGTCG                            | parS-LR3  | CACGTAGT   | parS-LR3  |
| TCTAGTCC                           | parS-LR4  | TCGGCGTG | parS-LR4  | TGTCGCTA                            | parS-LR4  | CACGTACG   | parS-LR4  |
| TCGGAGTG                           | parS-LR5  | TCGACTAC | parS-LR5  | CAACTCCA                            | parS-LR5  | CACGTTCC   | parS-LR5  |
| TCGAGCCC                           | parS-LR6  | TCGGGTAA | parS-LR6  | TGACGCTA                            | parS-LR6  | CACGTCTG   | parS-LR6  |
| TCGAATAG                           | parS-LR7  | TCGACCAC | parS-LR7  | TGACGTTG                            | parS-LR7  | CACGTGAT   | parS-LR7  |
| TCGAGGAG                           | parS-LR8  | TCGACTAT | parS-LR8  | TAGCGTTC                            | parS-LR8  | CACGTGAT   | parS-LR8  |
| TCGAGTAG                           | parS-LR9  | TCTCACCT | parS-LR9  | TGACCATG                            | parS-LR9  | AACGTGCT   | parS-LR9  |
| TCGACCTC                           | parS-RR1  | TCGGGTAA | parS-RR1  |                                     |           | CACGTAGT   | parS-RR1  |
| TAGAGGAT                           | parS-RR2  | TCGAGTAG | parS-RR2  |                                     |           | CACGTGGT   | parS-RR2  |
| TCGAGTCC                           | parS-RR3  | TCAACTAG | parS-RR3  |                                     |           | CACGTAGC   | parS-RR3  |
| TTGAGGAG                           | parS-RR4  | TCGACTAA | parS-RR4  |                                     |           | TACGTGCT   | parS-RR4  |
| TCGAGCAC                           | parS-RR5  | TCCACTAG | parS-RR5  |                                     |           | CACGTGGT   | parS-RR5  |
| TAGAGGAA                           | parS-RR6  | TCGACGGC | parS-RR6  |                                     |           | GACGTGCA   | parS-RR6  |
| TCGAGGAG                           | parS-RR7  |          |           |                                     |           |            |           |
| TCGAG <sup>g</sup> <sub>t</sub> an | Consensus | TCGAcTAn | Consensus | TGACG <sup>tt</sup> <sub>cc</sub> n | Consensus | CACGTnnt   | Consensus |

Figure S7
