# Supplementary material
Source: PubMed Central journal article supplement (PMC4998052)
Supplement: NIHMS809561-supplement-Supp_Fig_S8.pdf [file NIHMS809561-supplement-Supp_Fig_S8.pdf]

Pioneer

Alma

Bxb1

1

Create RedRock lysogen

2

Superinfect with phage

3

Purify strains

4

Grow liquid cultures

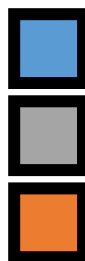

RedRock lysogen

Double lysogen

RedRock displaced

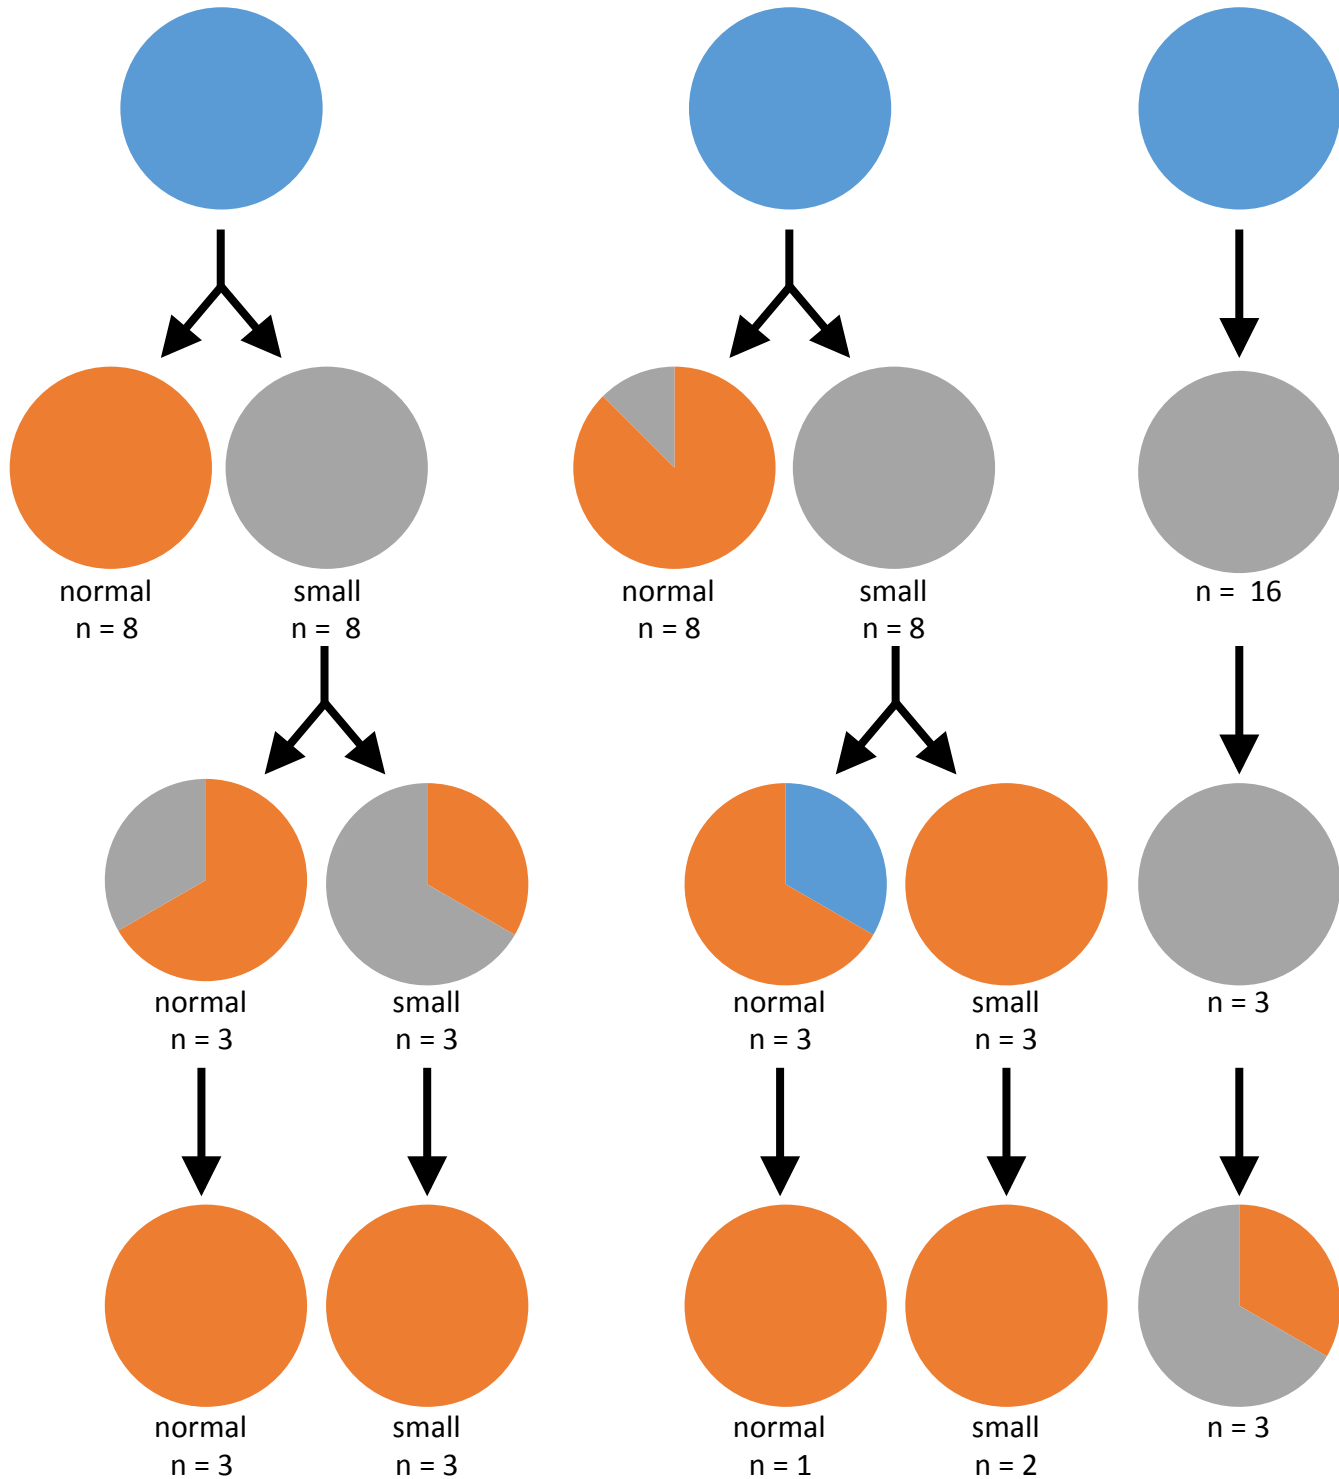

Figure S8
