# Supplementary material
Source: PubMed Central journal article supplement (PMC4998052)

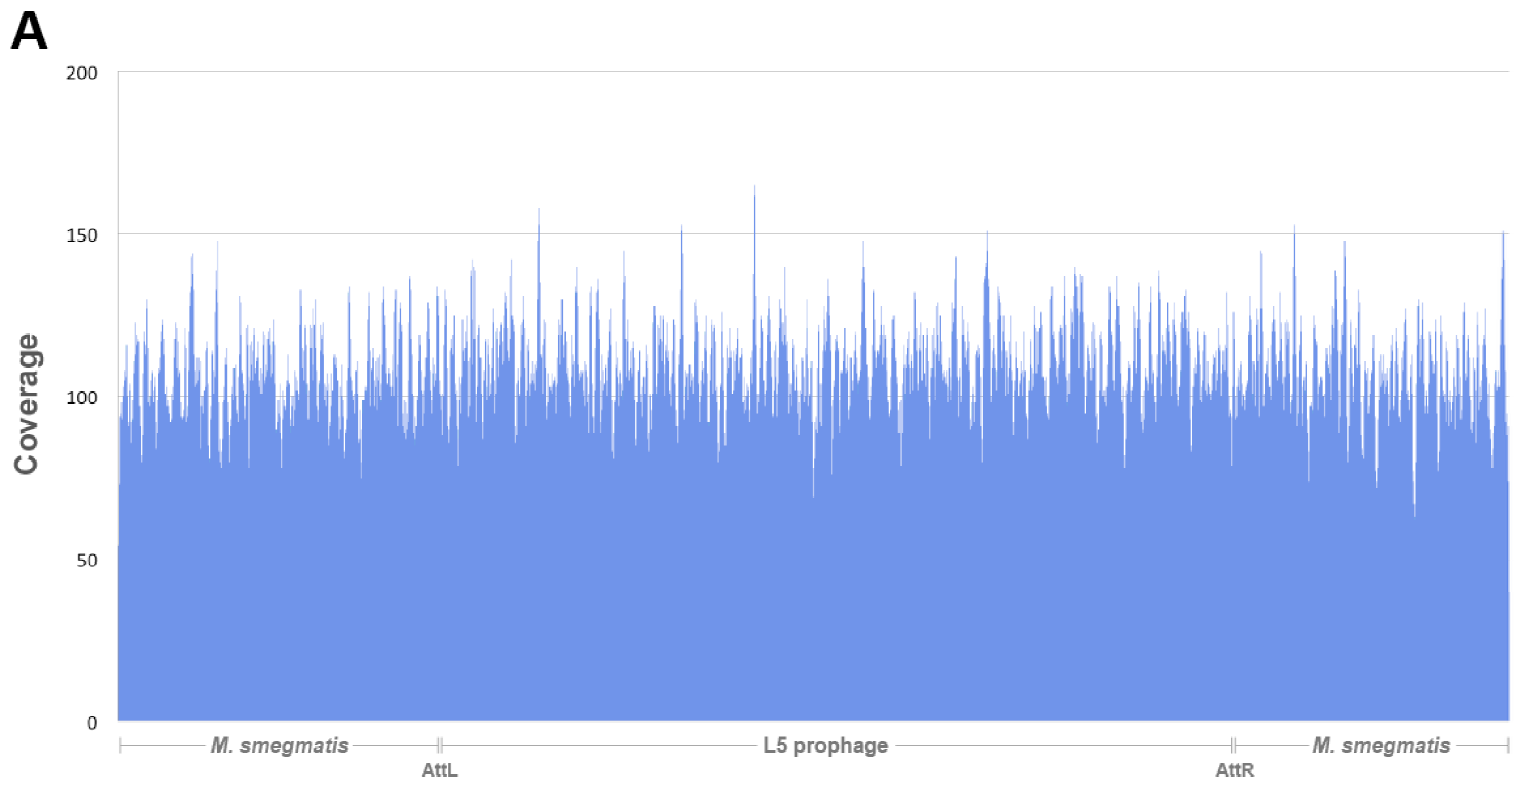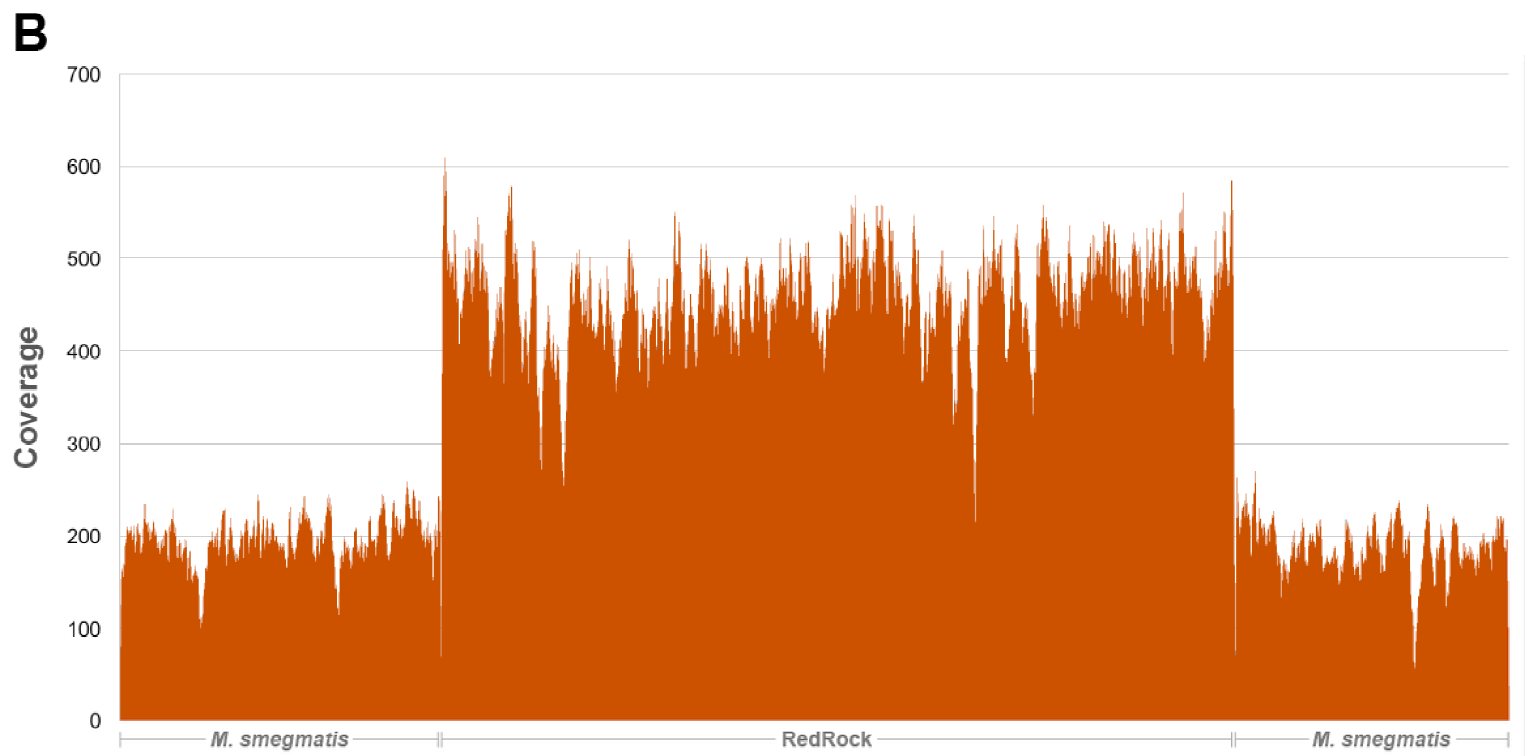

Figure S1

Supplement: NIHMS809561-supplement-Supp_Fig_S1.pdf [file NIHMS809561-supplement-Supp_Fig_S1.pdf]

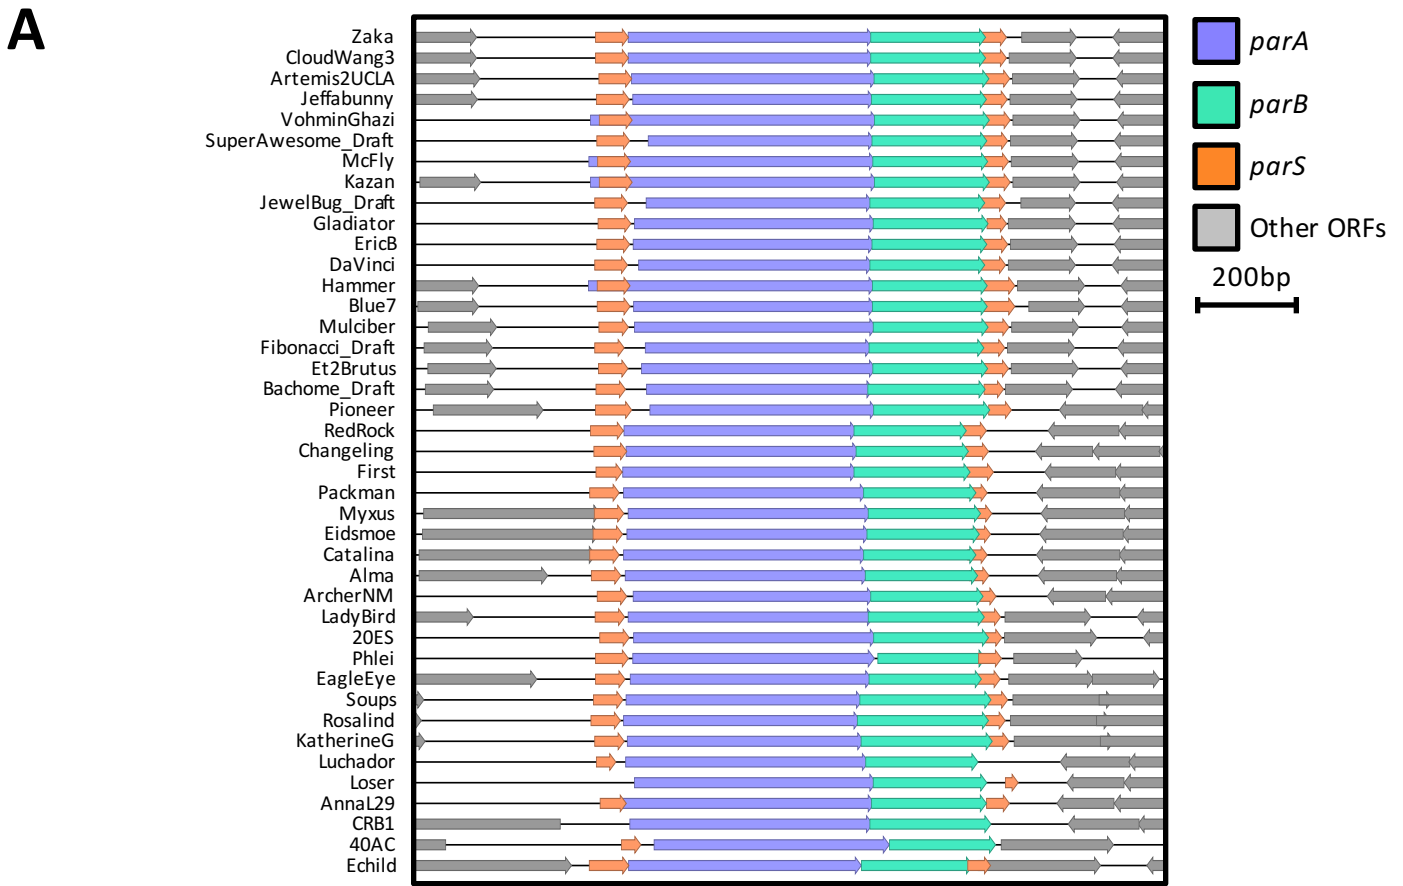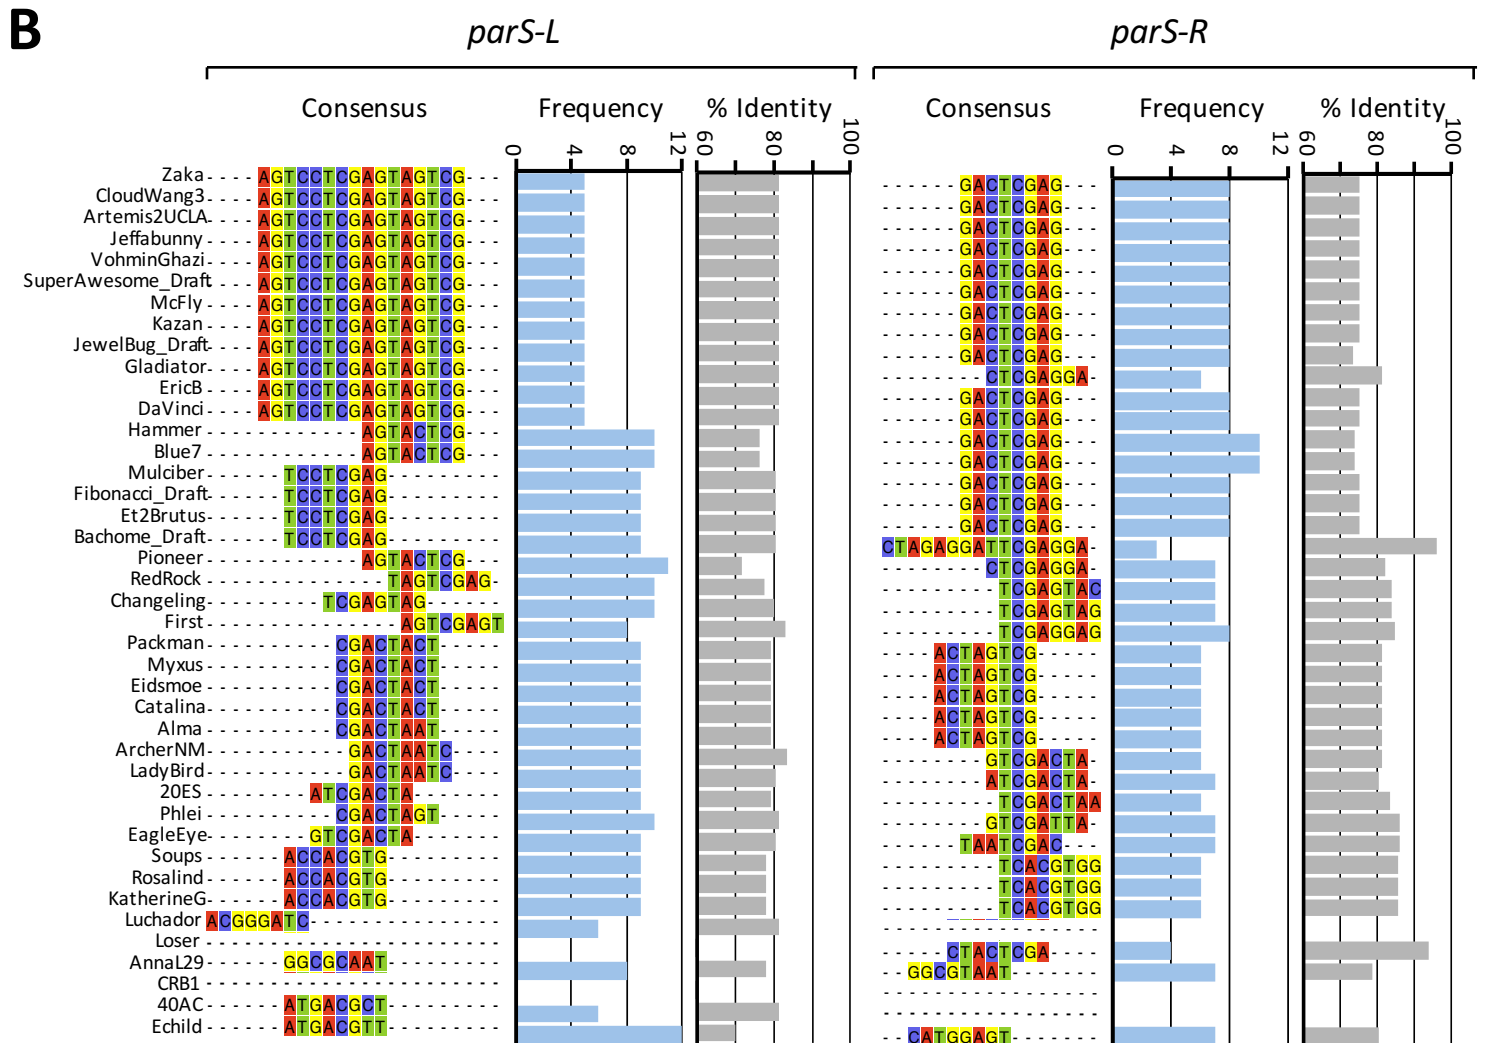

Figure S2

Supplement: NIHMS809561-supplement-Supp_Fig_S2.pdf [file NIHMS809561-supplement-Supp_Fig_S2.pdf]

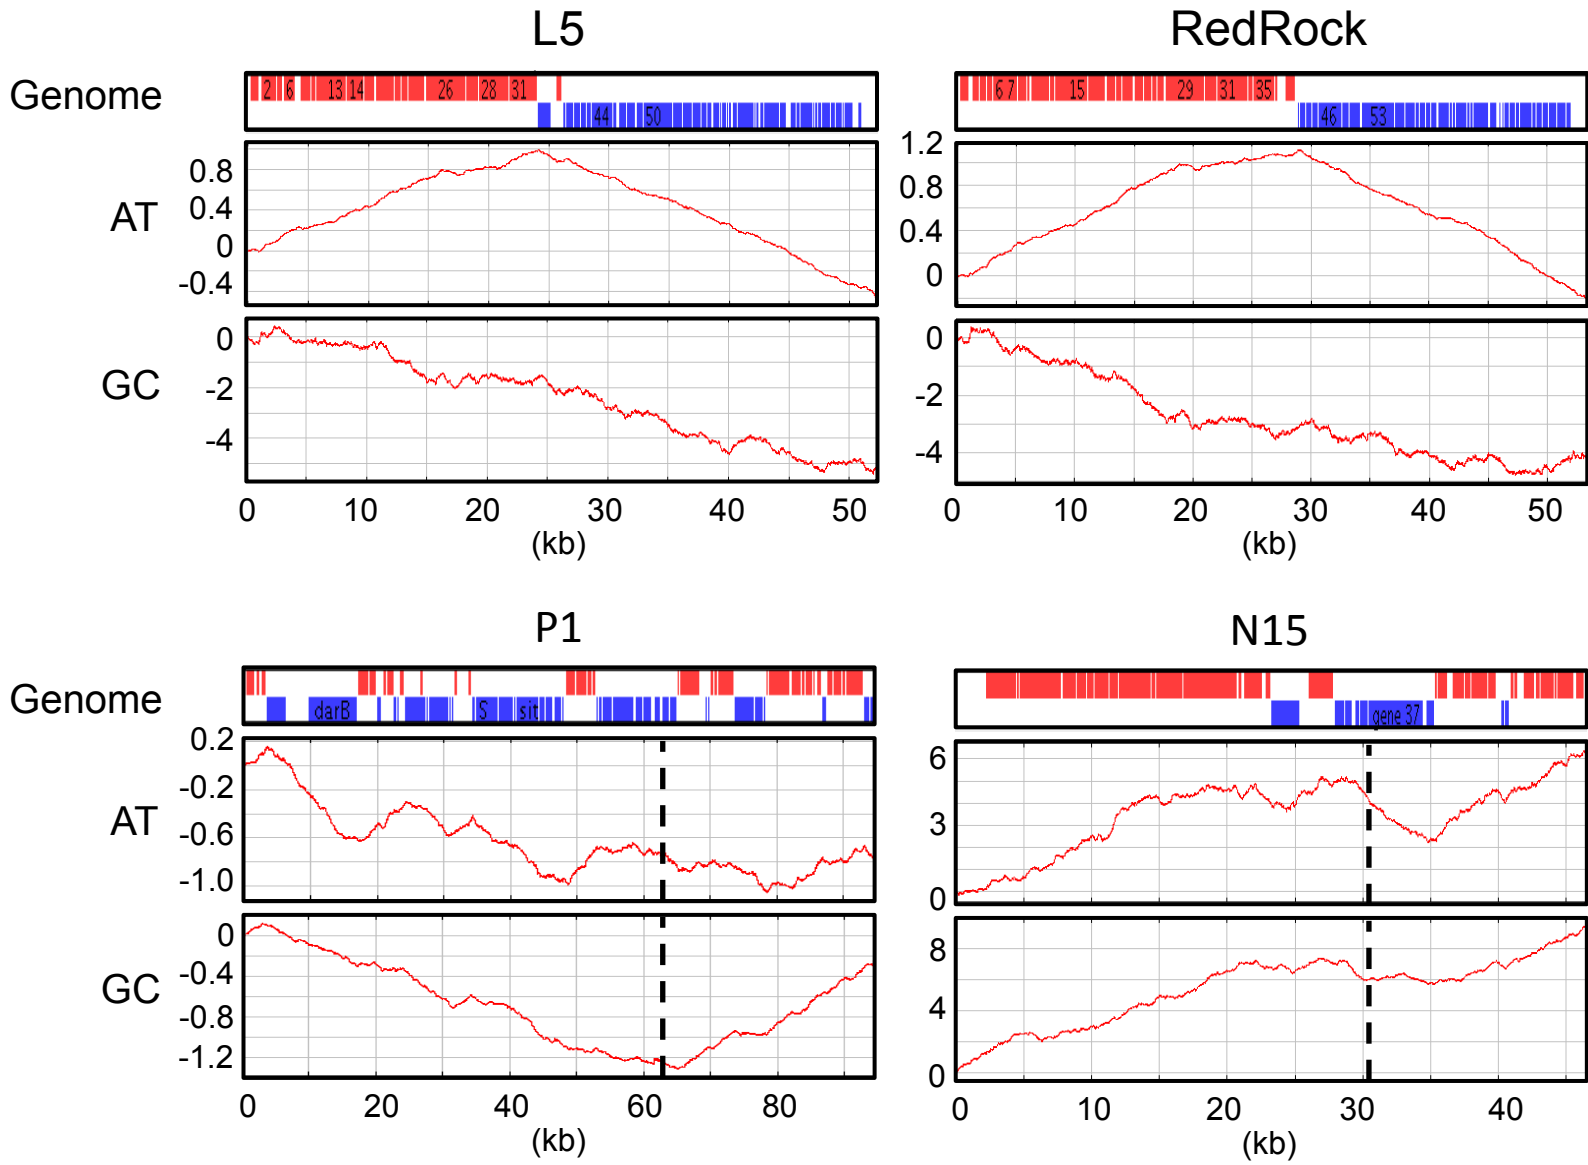

Figure S3

Supplement: NIHMS809561-supplement-Supp_Fig_S3.pdf [file NIHMS809561-supplement-Supp_Fig_S3.pdf]

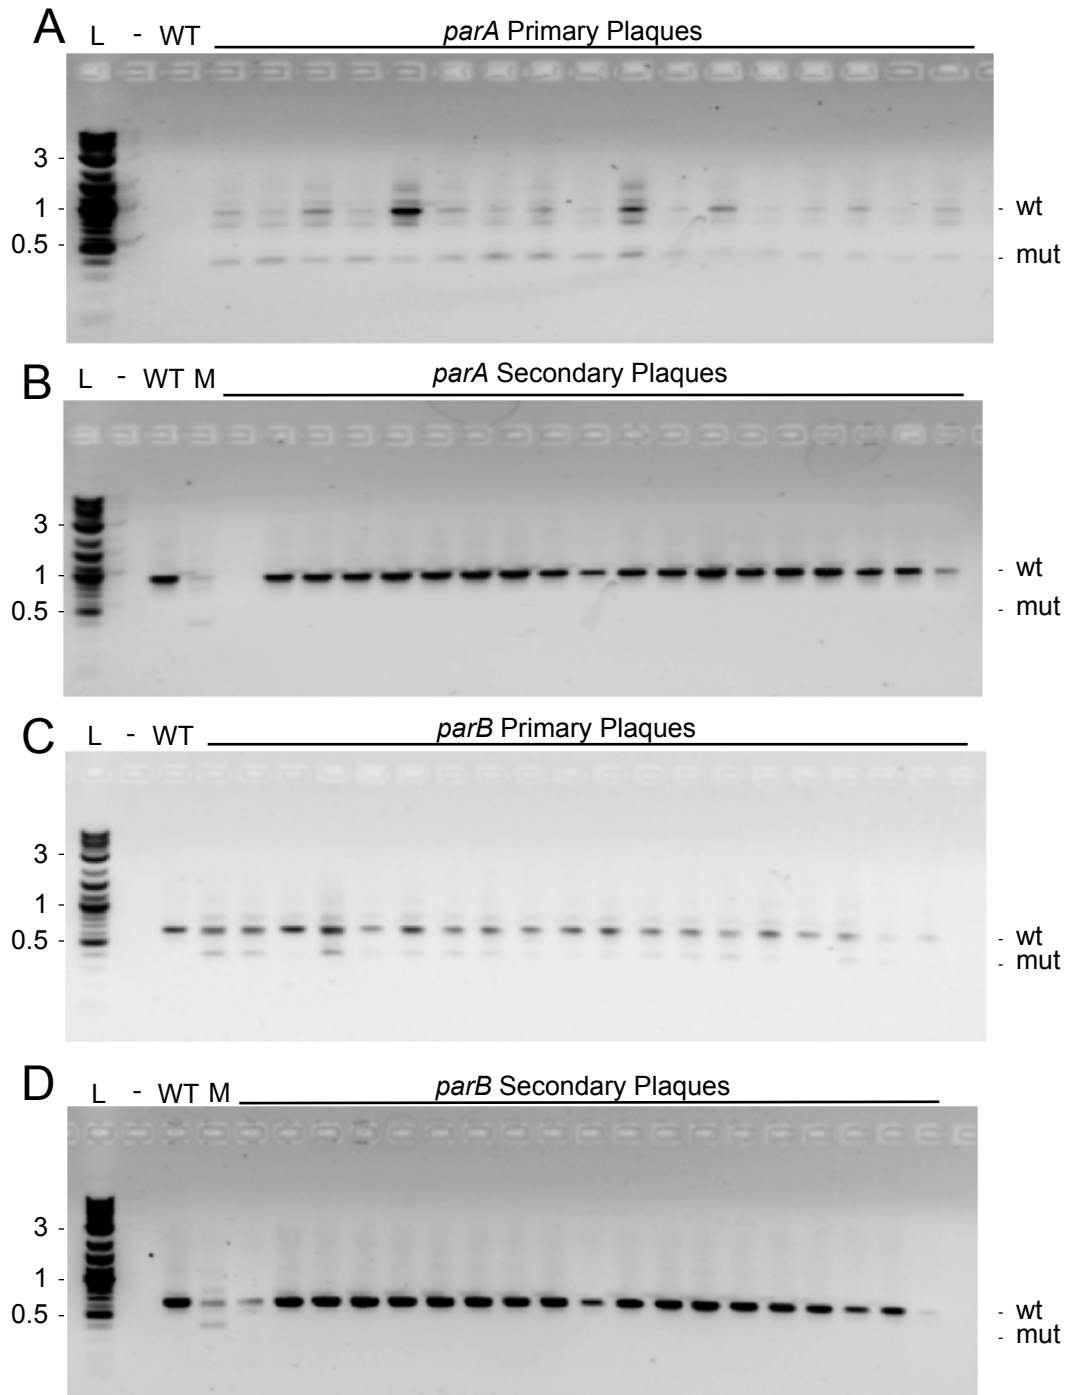

Figure S4

Supplement: NIHMS809561-supplement-Supp_Fig_S4.pdf [file NIHMS809561-supplement-Supp_Fig_S4.pdf]

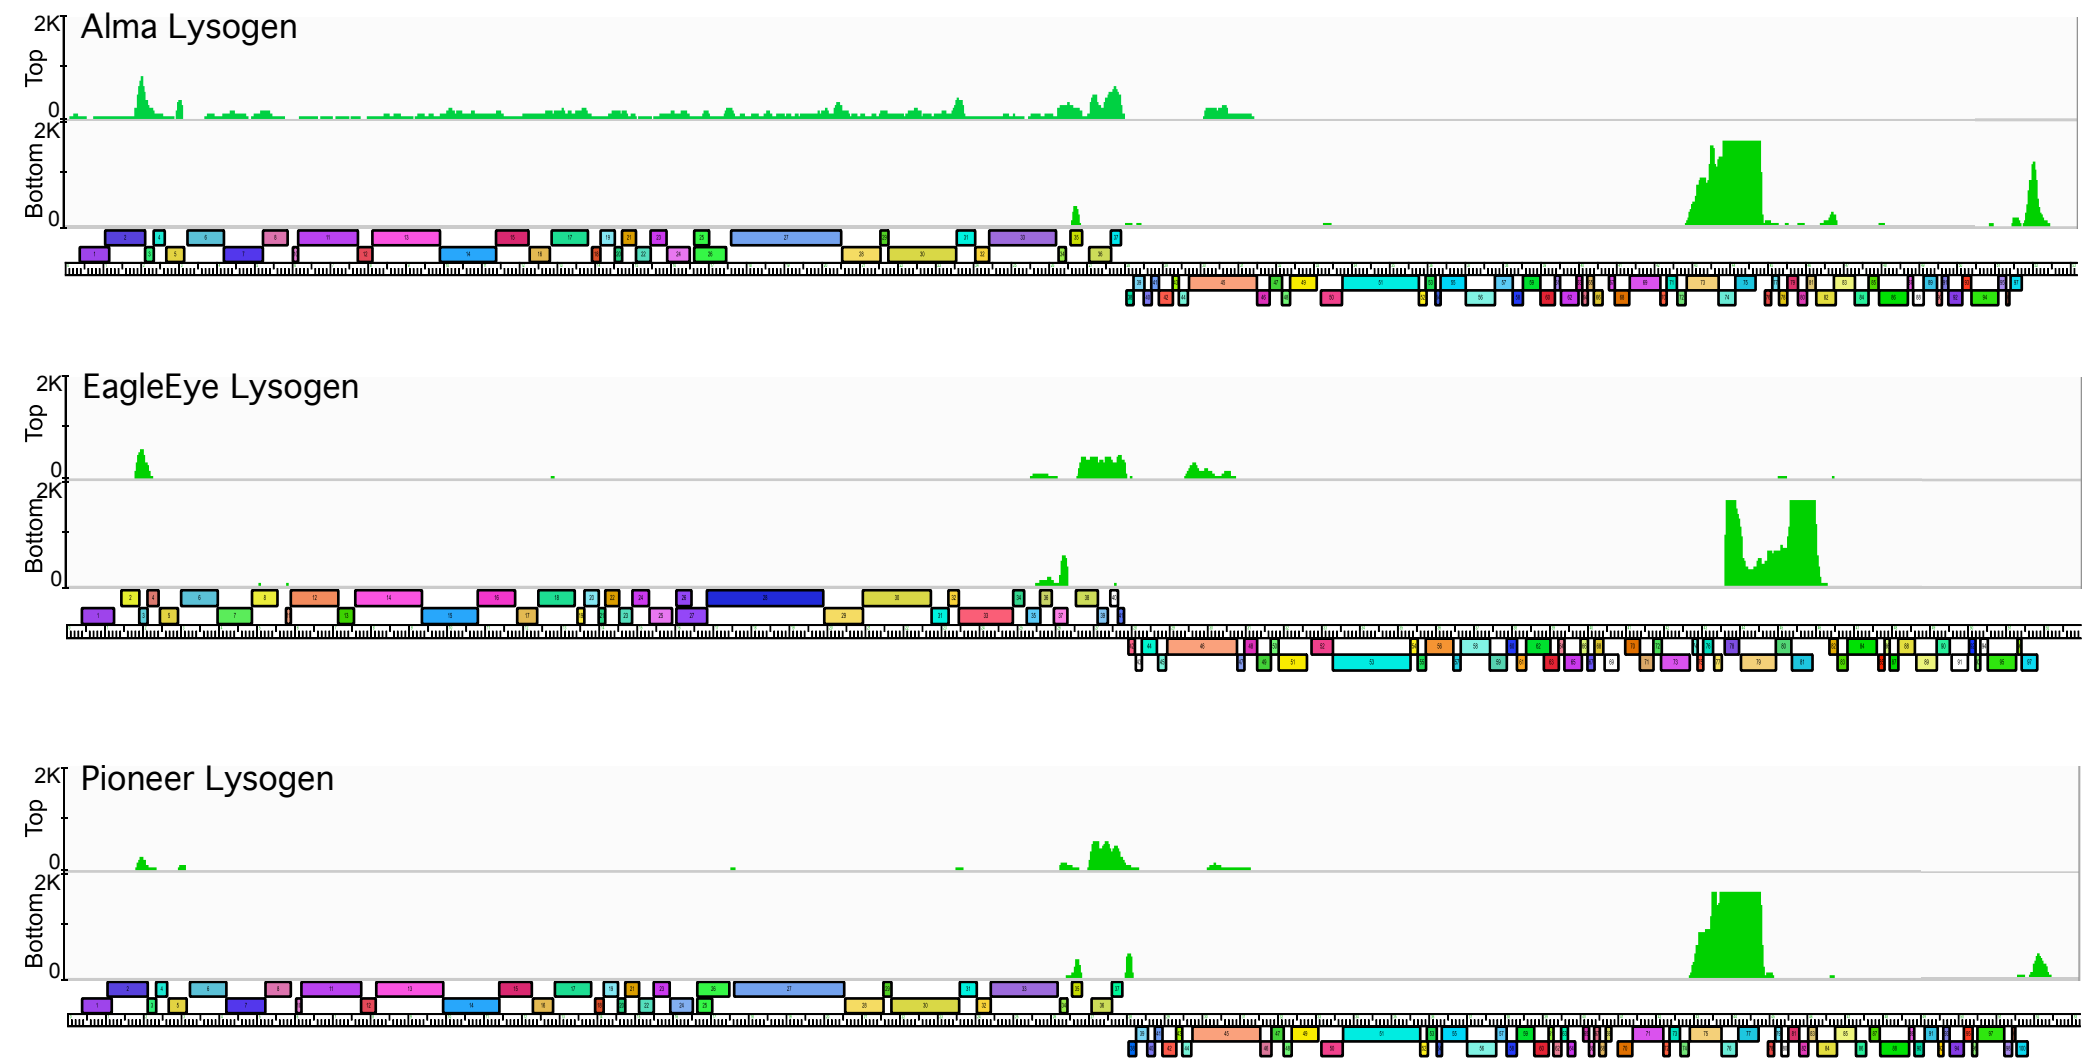

Figure S5

Supplement: NIHMS809561-supplement-Supp_Fig_S5.pdf [file NIHMS809561-supplement-Supp_Fig_S5.pdf]

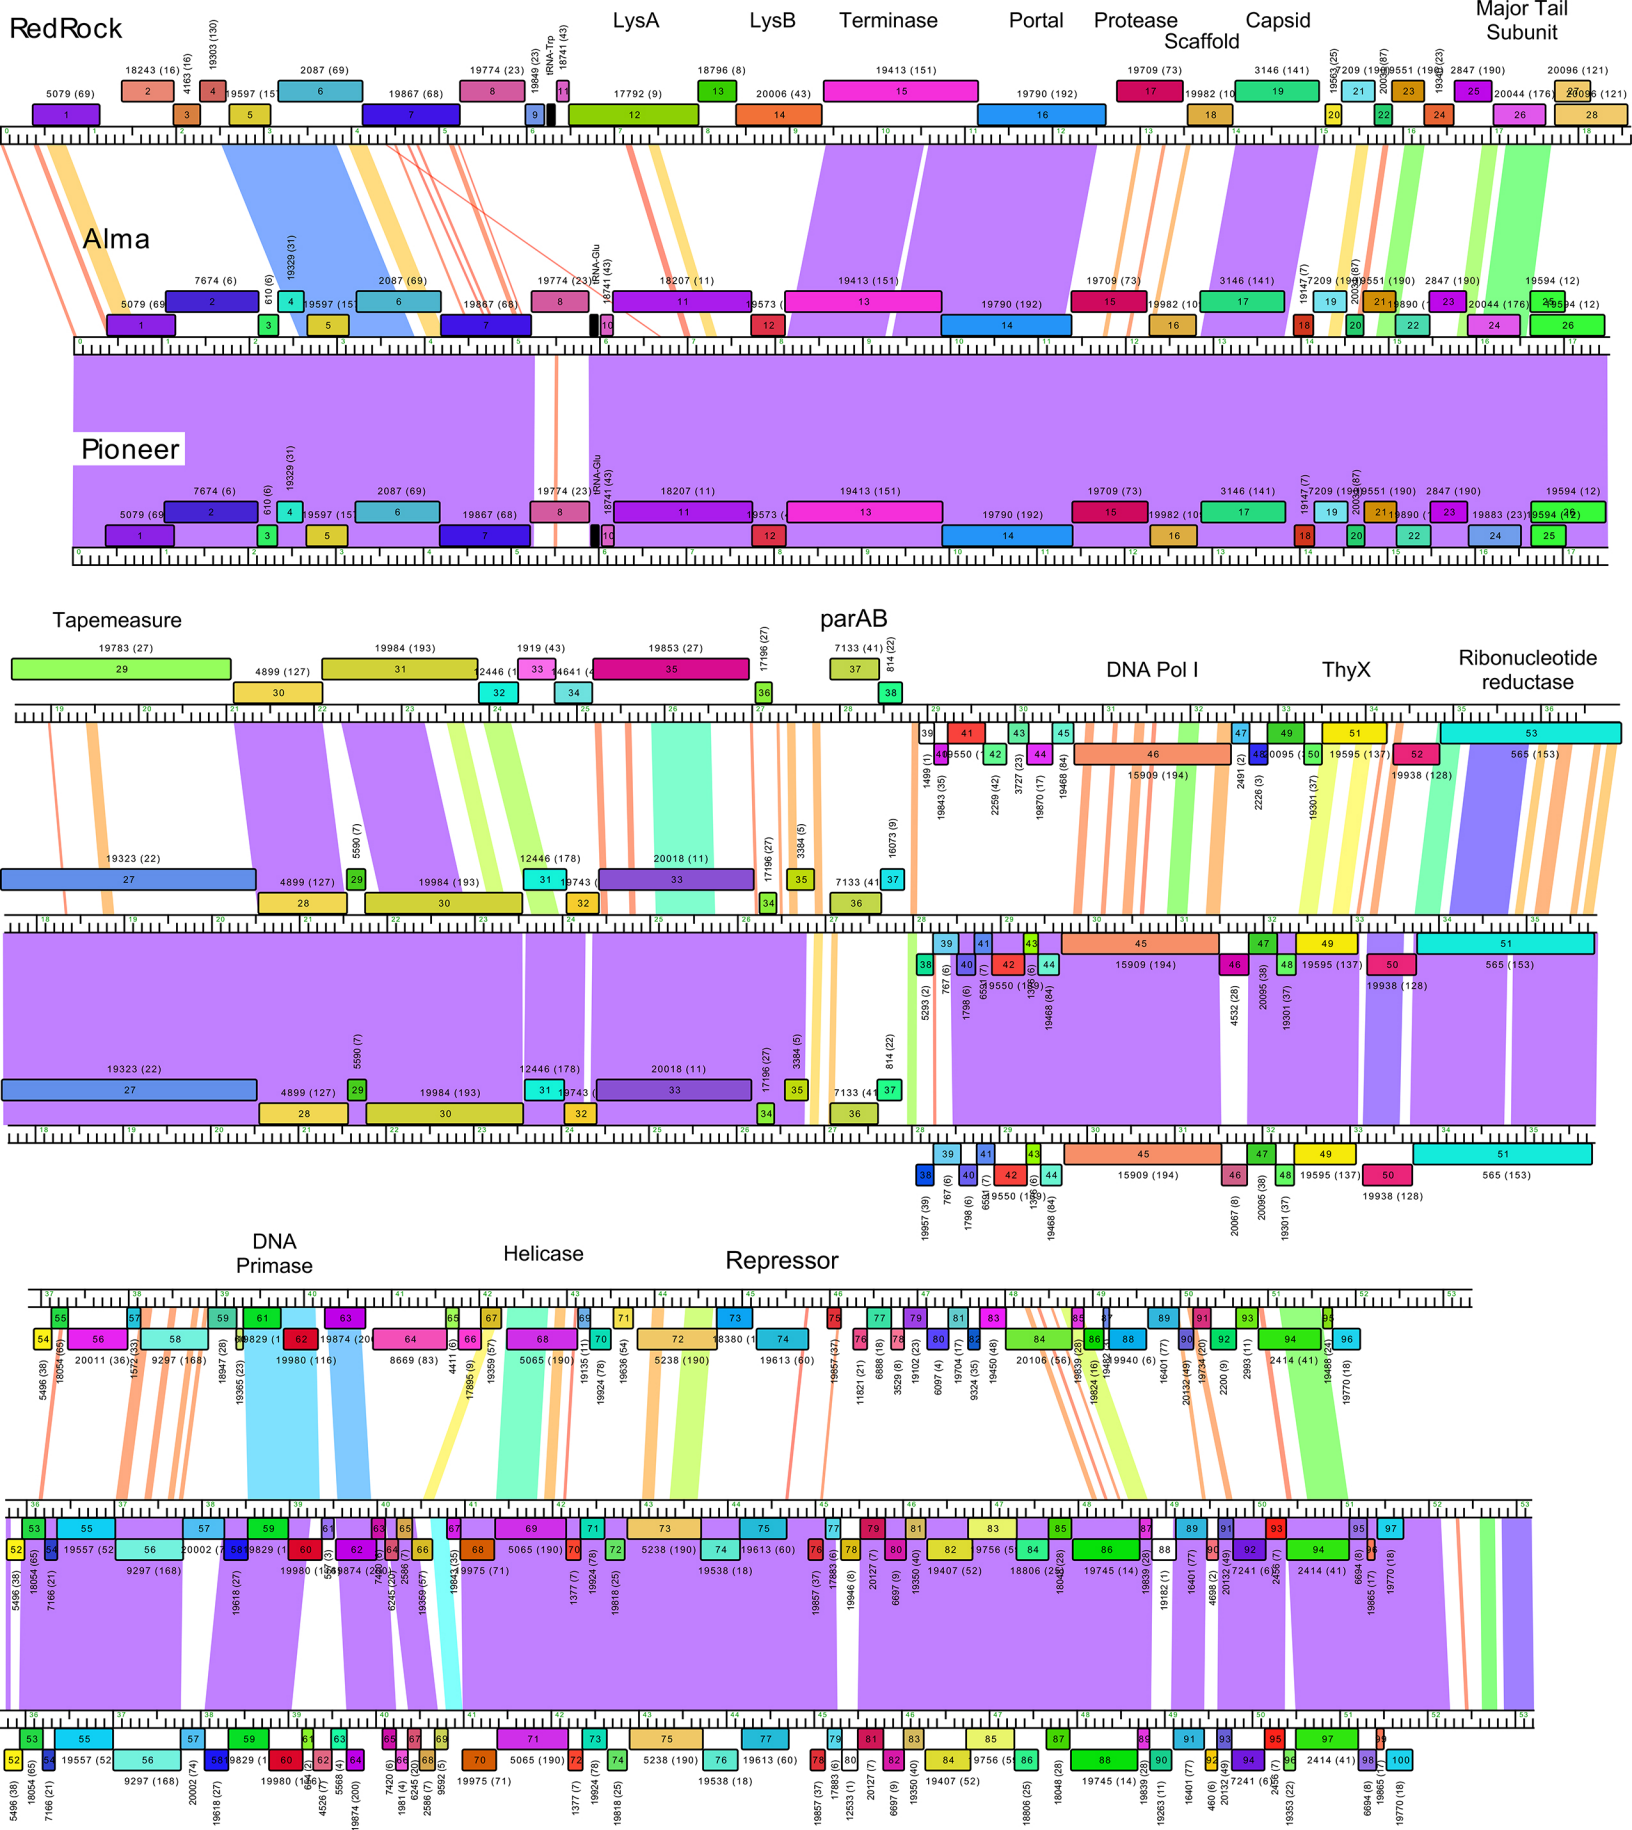

Figure S6

Supplement: NIHMS809561-supplement-Supp_Fig_S6.pdf [file NIHMS809561-supplement-Supp_Fig_S6.pdf]
